# Supplementary material for: Novel polymeric cobalt tetrabenzimidazole phthalocyanine for nanomolar detection of hydrogen peroxide
Source: Royal Society of Chemistry journal article supplement (doi:10.1039/d2su00035k), 2022-11-23
Supplement: d2su00035k1.pdf [file d2su00035k1.pdf]

## Supporting Information

# **Novel polymeric cobalt tetrabenzimidazole phthalocyanine for nanomolar detection of Hydrogen peroxide**

*Keshavananda Prabhu CP \*<sup>a</sup>, Kenkera Rayappa Naveen<sup>a</sup>, Shambhulinga Aralekallu<sup>b</sup>,  
Shivalingayya<sup>b</sup> and Lokesh Koodlur Sannegowda \*<sup>b</sup>*

<sup>a</sup> Department of Information Display, Kyung Hee University, Seoul, South Korea

<sup>b</sup>Department of Studies in Chemistry, Vijayanagara Sri Krishnadevaraya University,  
Vinayakanagara, Cantonment, Ballari-583105. Karnataka, INDIA.

\*Email: [keshavmgm@gmail.com](mailto:keshavmgm@gmail.com)

---

Electronic Supplementary Information

---

| <b>Data</b> | <b>Figure Caption</b>                                                                                                                                                              | <b>Page No.</b> |
|-------------|------------------------------------------------------------------------------------------------------------------------------------------------------------------------------------|-----------------|
| Fig. S1     | Mass spectrum of precursor <b>(i)</b> with mass fragment $M^{\cdot} = 290$ and $(M^{-2}) = 288$ .                                                                                  | <b>2</b>        |
| Fig. S2     | Mass spectrum of ligand <b>(ii)</b> with mass fragment $M^{\cdot} = 542$ ; $(M^{+1}) = 543$                                                                                        | <b>3</b>        |
| Fig. S3     | PXRD pattern of polyCoTBImpc.                                                                                                                                                      | <b>4</b>        |
| Fig. S4     | CVs for (i) bare GCE, (ii) and (iii) GCE/poly(CoTBImpc) with and without 100 nM $H_2O_2$ , (iv) and (v) GCE/CNP-poly(CoTBImpc) with and without 10 nM $H_2O_2$ in PBS.             | <b>5</b>        |
| Fig. S5     | Cyclic voltammograms for 50 nM $H_2O_2$ in PBS pH 7 at 50 to 500 mV/s scan rate on GCE/CNT/poly(CoTBImpc). Inset, Plot of current response at -0.45 V vs square root of scan rate. | <b>6</b>        |

---

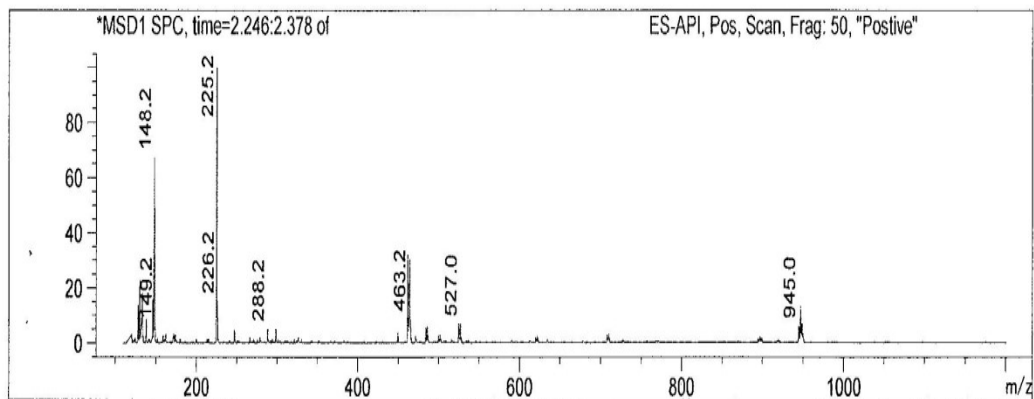

*Fig.S1.*

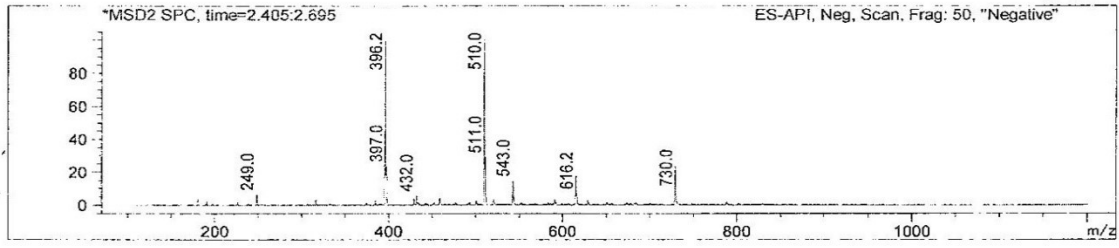

*Fig. S2.*

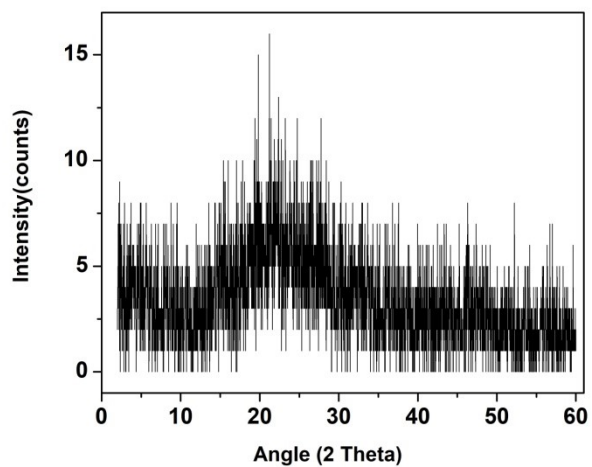

*Fig. S3.*

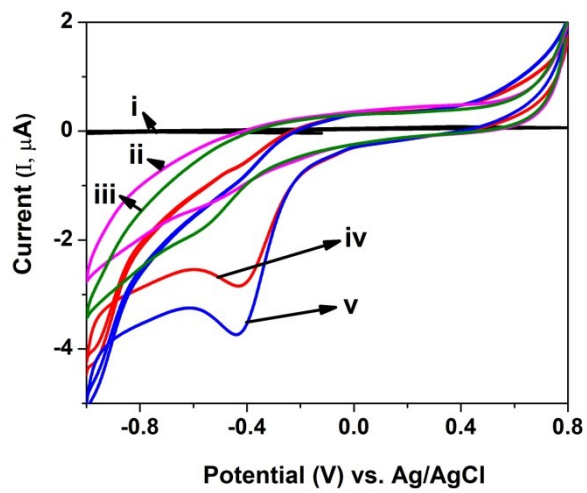

*Fig. S4.*

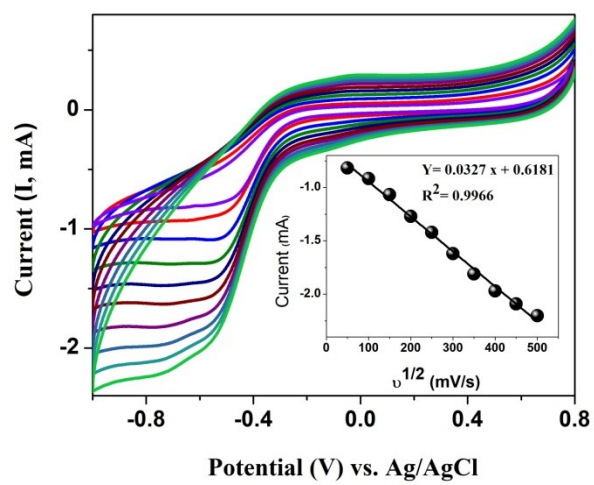

*Fig.S5.*
